# Supplementary material
Source: publisher site journal article supplement (https://herpetozoa.pensoft.net/article/59114/download/suppl/31/)
Supplement: Supplementary file 1

**Table S1.** Samples used for DNA analysis in this study.

| No. | Scientific name | Voucher | Locality | Genbank No. |
| --- | --- | --- | --- | --- |
| 1. | *Buergeria buergeri* | IABHU 41011 | Hiroshima, Japan | AB127977 |
| 2. | *Rhacophorus* *hoabinhensis* | IEBR A.2016.18 | Hoa Binh, Vietnam | LC331096 |
| 3. | *R. kio* | SCUM 37941C | Yunnan, China | EU215532 |
| 4. | *R. orlovi* | VNMN 24628 | Ha Tinh, Vietnam, Vietnam | LC545588 |
| 5. | *Zhangixalus burmanus* | Rao6239 | Xizang, China | JX219422 |
| 6. | *Z. burmanus* | SCUM 060614L | Yunnan, China | EU215537 |
| 7. | *Z. chenfui* | SCUM 060404L | Sichuan, China | EU215534 |
| 8. | *Z. chenfui* | RAO ZT 0806013 | Yunnan, China | JX219431 |
| 9. | *Z. dennysi* | Li06 | Hunan, China | JX219433 |
| 10. | *Z. dennysi* | SCUM 060401L | Guangdong, China | EU215545 |
| 11. | *Z. dorsoviridis* | ROM38015 | Lao Cai, Vietnam | JX219423 |
| 12. | *Z. dorsoviridis* | Rao060821199 | Yunnan, China | JX219426 |
| 13. | *Z. duboisi* | ROM38771 | Lao Cai, Vietnam | JX219413 |
| 14. | *Z. duboisi* | ROM38758 | Lao Cai, Vietnam | JX219414 |
| 15. | *Z. dugritei* | LJT 060559 | Sichuan, China | JN688875 |
| 16. | *Z. dugritei* | SCUM 051017 L 11 | Sichuan, China | EU215540 |
| 17. | *Z. feae* | VNMN 3462 | Sa Pa, Vietnam | LC010588 |
| 18. | *Z. feae* | SCUM 050642W | Yunnan, China | EU215544 |
| 19. | *Z. franki* | VNMN 011686 | Ha Giang, Vietnam | LC548745 |
| 20. | *Z. franki* | VNMN 011687 | Ha Giang, Vietnam | LC548746 |
| 21. | *Z. franki* | KIZ 0654 | Yunnan, China | MW116368 |
| 22. | *Z. franki* | KIZ 1263 | Yunnan, China | MW116369 |
| 23. | *Z. hongchibaensis* | CIB 097687 | Chongqing, China | JN688883 |
| 24. | *Z. hongchibaensis* | CIB 097696 | Chongqing, China | JN688882 |
| 25. | *Z. hungfuensis* | SCUM 060425L | Sichuan, China | EU215538 |
| 26. | *Z. hungfuensis* | SCUM 060424L | Sichuan, China | JN688879 |
| 27. | *Z. jodiae* | VNMN07120 | Ha Giang, Vietnam | LC545593 |
| 28. | *Z. jodiae* | VNMN07121 | Ha Giang, Vietnam | LC545594 |
| 29. | *Z. minimus* | KIZ 061214YP | Guangxi, China | EU215539 |
| 30. | *Z. minimus* | KUHE:70049 | China | LC386569 |
| 31. | *Z. nigropunctatus* | Rao3494 | Yunnan, China | JX219429 |
| 32. | *Z. nigropunctatus* | GZ070658 | Guizhou, China | JX219430 |
| 33. | *Z. omeimontis* | Li02 | Sichuan, China | JX219420 |
| 34. | *Z. omeimontis* | SC080505 | Sichuan, China | JX219421 |
| 35. | *Z. pachyproctus* | KIZ 090148 | Yunnan, China | MN613222 |
| 36. | *Z. pachyproctus* | KIZ 090149 | Yunnan, China | MN613223 |
| 37. | *Z. pinglongensis* | NHMG201002011 | Guangxi, China | KU170684 |
| 38. | *Z. pinglongensis* | NHMG201002003 | Guangxi, China | KU170683 |
| 39. | *Z. puerensis* | SCUM 060649L | Yunnan, China | EU215542 |
| 40. | *Z. puerensis* | ROM 37996 | Lao Cai, Vietnam | JN688891 |
| 41. | *Z. schlegelii* | KUHE 44531 | Okayama, Japan | LC369670 |
| 42. | *Z. schlegelii* | Genbank | Hiroshima, Japan | AB202078 |
| 43. | *Z. smaragdinus* | KIZ 06241Rao | Tibet, China | JX219411 |
| 44. | *Z. smaragdinus* | KIZ 20160298 | Yunnan, China | MN613219 |
| 45. | *Z. wui* | CIB 097685 | Hubei, China | JN688881 |
| 46. | *Z. wui* | CIB 097690 | Hubei, China | JN688880 |
| 47. | *Z. yaoshanensis* | NHMG150408 | Guangxi, China | MG322122 |
| 48. | *Z. yaoshanensis* | NHMG150404 | Guangxi, China | MG322121 |
| 49. | *Z. zhoukaiyae* | AHU-RhaDb-120428 | Anhui, China | KU601502 |
| 50. | *Z. zhoukaiyae* | RhaDb-150420-02 | Anhui, China | KU601501 |
